# Supplementary material
Source: ML conference proceedings conference paper supplement (https://proceedings.neurips.cc/paper_files/paper/2022/hash/854a9ab0f323b841955e70ca383b27d1-Abstract.html)
Supplement: Supplementary file 1 [file 854a9ab0f323b841955e70ca383b27d1-Supplemental-Conference.pdf]

505 **A More Details of Motivating Observations**

506 **Experiment Setup.** We conduct experiments on the Newman artificial networks [10] with different  
 507 properties. The network consists of 128 nodes divided into 4 classes, where each node has on average  
 508  $z_{in}$  edges (i.e., intra-class edges) connecting to nodes of the same class and  $z_{out}$  edges (i.e., inter-class  
 509 edges) to nodes of other classes, and  $z_{in} + z_{out} = 16$ . Here two indicators are used:  $\rho_{in} = z_{in}/32$   
 510 and  $\rho_{out} = z_{out}/96$ , to indicate the graph property, i.e.,  $\rho_{in} > \rho_{out}$ ,  $\rho_{in} = \rho_{out}$  and  $\rho_{in} < \rho_{out}$   
 511 means the graph with homophily, randomness and heterophily, respectively. In Figure 5, we show the  
 512 visualization of the adjacency matrix with strong homophily, randomness and strong heterophily.

513 For the node attributes, we generate  $4h$ -dimensional binary attributes (i.e.,  $x_i$ ) for each node to form  
 514 4 attribute clusters, corresponding to the 4 classes [13]. To be specific, for every node in the  $i$ -th  
 515 class, we use a binomial distribution with mean  $p_{in} = h_{in}/h$  to generate a  $h$ -dimensional binary  
 516 vector as its  $((i - 1) \times h + 1)$ -th to  $(i \times h)$ -th attributes, and generated the rest attributes using  
 517 a binomial distribution with mean  $p_{out} = h_{out}/(3h)$ . In our experiments, we set  $4h = 200$  and  
 518  $h_{out} = 4(h_{in} + h_{out} = 16)$ , so that  $p_{in} > p_{out}$ , the  $h$ -dimensional attributes are associated with  
 519 the  $i$ -th class with a higher probability, whereas the rest  $3h$  attributes are irrelevant. For the model  
 520 implementation, we use the Gophormer [43] with the default setting for the demonstration. For each  
 521 center node, we sample 10 nodes with 1-hop, 2-hop, KNN and PPR strategies 16 times for data  
 522 augmentation.

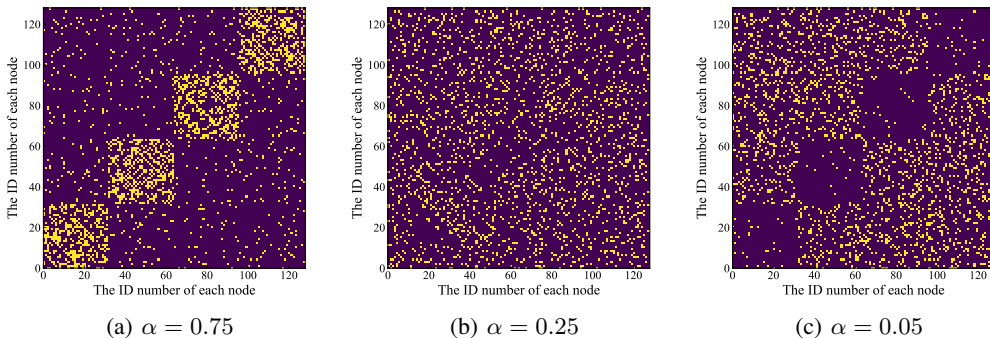

Figure 5: The adjacency matrix of the Newman network with strong homophily, randomness and strong heterophily respectively. (The yellow dots indicate connected edges and the purple dots indicate no edges.)

523 **B Dataset Statistics**

In Table 3, we show the detailed statistics of 9 datasets.

Table 3: The statistics of the datasets.

| Dataset   | #Nodes | #Edges  | #Classes | #Features | Type             | $\alpha$ |
|-----------|--------|---------|----------|-----------|------------------|----------|
| Cora      | 2,708  | 5,278   | 7        | 1,433     | Citation network | 0.83     |
| Citeseer  | 3,327  | 4,522   | 6        | 3,703     | Citation network | 0.71     |
| Pubmed    | 19,717 | 44,324  | 3        | 500       | Citation network | 0.79     |
| Chameleon | 2,277  | 31,371  | 5        | 2,325     | Wiki pages       | 0.23     |
| Actor     | 7,600  | 26,659  | 5        | 932       | Actors in movies | 0.22     |
| Squirrel  | 5,201  | 198,353 | 5        | 2,089     | Wiki pages       | 0.22     |
| Texas     | 183    | 279     | 5        | 1703      | Web pages        | 0.11     |
| Cornell   | 183    | 277     | 5        | 1703      | Web pages        | 0.30     |
| Wisconsin | 251    | 499     | 5        | 1703      | Web pages        | 0.21     |

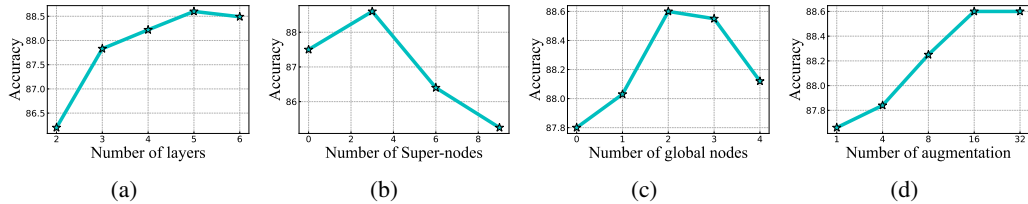

Figure 6: Parameter sensitivity analysis on Cora. We show (a) the influence of the number of layers; (b) the number of super-nodes; (c) the number of global nodes; (d) and the number of augmentation.

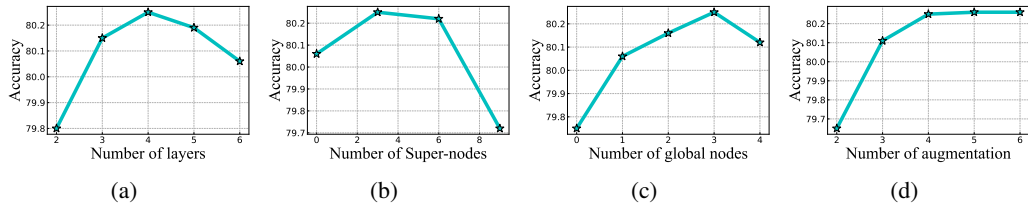

Figure 7: Parameter sensitivity analysis on Citeseer.

## 525 C Additional Results and Analysis

Table 4: Time consumption for graph coarsening (s). The coarsening rate  $c$  is defined as  $\frac{|V'|}{|V|}$

| Dataset | Method | c=0.01 | c=0.10 | c=0.50 |
|---------|--------|--------|--------|--------|
| Cora    | VN     | 3.792  | 3.536  | 2.215  |
|         | VE     | 1.540  | 1.516  | 0.851  |
|         | JC     | 1.454  | 1.271  | 0.665  |
| Actor   | VN     | 11.868 | 11.53  | 7.000  |
|         | VE     | 7.535  | 6.911  | 3.154  |
|         | JC     | 11.785 | 11.624 | 3.651  |

### 526 C.1 Hyper-parameter Analysis

527 In Figure 6, we study the sensitivity of ANS-GT on four important hyper-parameters: the number of  
 528 transformer layers, the number of super-nodes  $n_s$ , the number of global nodes  $n_g$ , and the number of  
 529 data augmentation  $\mathcal{S}$ . In Figure 6 (a), we observe that the performance increases at the beginning with  
 530 the increase of transformer layers. The reason is that stacking more transformer layers improves the  
 531 model’s capability. However, we witness a slight performance decrease when the number of layers  
 532 exceeds 6, possibly suffering from over-fitting. Figure 6 (b) and (c) presents the node classification  
 533 performance with  $n_s$  varying from 0 to 9 and  $n_g$  from 0 to 4 respectively. With the increase of  
 534  $n_s$  and  $n_g$ , the performance increases until reaches a peak and then decreases. This is expected as  
 535 the optimal number of super-nodes and global nodes help incorporate long-range dependencies and  
 536 global context in the graph while too large  $n_s$  and  $n_g$  lead to redundant noise. Hence, the number of  
 537 super-nodes and global nodes should be carefully chosen to achieve optimal performance. Finally,  
 538 we show the influence of the number of data augmentation in Figure 6 (d). With the increase of  
 539  $\mathcal{S}$ , the node classification performance improves steadily until stabilizes. The results indicate data  
 540 augmentation in the training and the bagging aggregation in the inference can effectively improve the  
 541 classification accuracy. In conclusion, we recommend 5 transformer layers, 3 super-nodes, 2 global  
 542 nodes, and an augmentation number of 16 for Cora.

### 543 C.2 Efficiency Analysis of ANS-GT

544 Here we show more experiment results and analysis on the efficiency of ANS-GT.

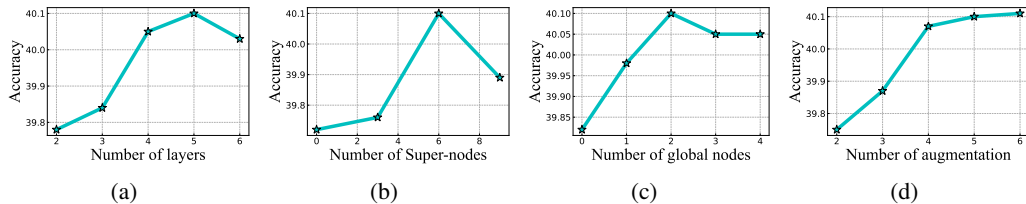

Figure 8: Parameter sensitivity analysis on Actor.

Table 5: Time consumption for adaptive node sampling per epoch (s).

| Dataset | Cora  | Citeseer | Pubmed | Chameleon | Actor | Squirrel |
|---------|-------|----------|--------|-----------|-------|----------|
| Time    | 0.838 | 0.926    | 1.717  | 0.855     | 1.026 | 0.977    |

545 In Table 4, we present the time consumption of executing the graph coarsening algorithm on Cora  
 546 and Actor with different coarsening rates and methods. Since graph coarsening only needs to be done  
 547 once at the pre-processing stage, the time consumption is acceptable.

548 In Table 5, we show the time consumption for adaptive sampling in one epoch. In our algorithm, we  
 549 update the sampling weights every  $T$  epochs ( $T = 100$  in experiments). Hence, the time cost of the  
 550 adaptive node sampling module is trivial.

551 In Table 6, we present the training efficiency comparisons with other Graph Transformer baselines.  
 552 Specifically, we show the average training time per epoch. As can be observed in Table 6, ANS-GT  
 553 has comparable training time with Gophormer and its efficiency is much better than Graphormer.

### 554 C.3 Limitations and Potential Negative Social Impacts

555 One limitation of our work is that it introduces more hyper-parameters for finetuning. Since our work  
 556 utilizes adaptive node sampling, it may lead to potential biases in sampling nodes for training.

### 557 C.4 Additional Results on OGB Datasets

558 We additionally try ANS-GT on ogbn-arxiv and ogbn-products datasets from OGB [15], which  
 559 contains 169,343 and 2,449,029 nodes respectively. We use the official train/valid/test split and data  
 560 pre-processing details can be found in [15]. The model setup of ANS-GT follows Section 6.1. Three  
 561 competitive baselines including GCN, GraphSAGE, and GPRGNN are selected. We present average  
 562 accuracies and standard deviations over 5 runs in Table 7. Our results overperform the baselines and  
 563 demonstrate the effectiveness of ANS-GT on large-scale graphs.

## 564 D Supplementary Information of Graph Coarsening

565 In this paper, we use 3 popular graph coarsening algorithms: Variation Neighborhoods (VN) [26],  
 566 Variation Edges (VE) [26], and Algebraic JC (JC) [30]. VN and VE belong to the local variation  
 567 algorithms which coarsen graphs by preserving the spectral properties of adjacency matrix. Local  
 568 variation algorithms differ only in the type of contraction sets that they consider: Variation Edges  
 569 only contracts edges, whereas contraction sets in Variation Neighborhoods are subsets of nodes'  
 570 neighborhood. In Algebraic JC, the algebraic distances between neighboring nodes are calculated  
 571 and close nodes are contracted to form clusters. More information of the coarsening algorithms can  
 572 be found in their original papers.

## 573 E Further Discussions of ANS-GT

574 In ANS-GT, we formulate the optimization strategy of node sampling in Graph Transformer as an  
 575 adversary bandit problem. Specifically, ANS-GT optimizes the weights of chosen sampling heuristics  
 576 instead of directly predicting the adjacent nodes to attend. Then, ANS-GT combines the weighted

Table 6: Efficiency comparisons with Graph Transformer baselines. The average training time per epoch (s)

| Dataset    | Cora   | Citeseer | Pubmed | Chameleon | Actor  | Squirrel |
|------------|--------|----------|--------|-----------|--------|----------|
| Graphormer | 25.670 | 37.899   | 26.436 | 26.343    | 30.105 | 29.771   |
| Gophormer  | 11.210 | 12.121   | 16.116 | 10.305    | 12.243 | 12.579   |
| ANS-GT     | 11.495 | 12.143   | 16.270 | 10.311    | 12.240 | 12.571   |

Table 7: The performance of ANS-GT and selected baselines on OGB datasets

| Methods       | GCN        | GraphSAGE  | GPRGNN     | ANS-GT            |
|---------------|------------|------------|------------|-------------------|
| ogbn-arxiv    | 71.72±0.45 | 71.46±0.26 | 70.90±0.23 | <b>72.84±0.34</b> |
| ogbn-products | 75.57±0.28 | 78.61±0.31 | 79.76±0.59 | <b>82.15±0.30</b> |

577 sampling heuristics to sample informative nodes. We did not incorporate hierarchical attention  
578 as part of the bandit learning because it samples supernodes from the coarsened graph instead of  
579 sampling nodes like the 4 strategies (1-/2- hops, KNN, and PPR). We do not directly predict nodes to  
580 attend (e.g., using linear layers to predict informative nodes). Directly predicting informative nodes  
581 for attention requires too much computational overhead and is hard to optimize. Comparatively,  
582 the pre-defined node sampling heuristics in our strategy help narrow the search space with prior  
583 knowledge. Moreover, the sampling strategy in ANS-GT can generalize to all nodes in the graph  
584 efficiently. Experiment results show that our strategy is effective and efficient.
